# Supplementary material for: Force determination in lateral magnetic tweezers combined with TIRF microscopy
Source: Royal Society of Chemistry journal article supplement (doi:10.1039/c7nr07344e), 2018-01-01
Supplement: c7nr07344e1.pdf [file c7nr07344e1.pdf]

## Supplementary Information

# Force determination in Lateral Magnetic Tweezers combined with TIRF microscopy

J. Madariaga-Marcos<sup>a</sup>, S. Hormeño<sup>a</sup>, C. L. Pastrana<sup>a</sup>, G. L. M. Fisher<sup>b</sup>, M. S. Dillingham<sup>b</sup>, and F. Moreno-Herrero <sup>\*a</sup>

<sup>a</sup>Department of Macromolecular Structures, Centro Nacional de Biotecnología, Consejo Superior de Investigaciones Científicas, 28049 Cantoblanco, Madrid, Spain

<sup>b</sup>DNA:Protein Interactions Unit. School of Biochemistry, Biomedical Sciences Building, University of Bristol, Bristol, BS8 1TD, UK.

### Calculation of extension for off-center attached beads

#### Vertical Magnetic Tweezers configuration (Fig. S6a)

$$z_{corr} = R(1 - \cos \beta) \quad (S1)$$

$$\beta = \sin^{-1}(r/R) \quad (S2)$$

$$l = z + z_{corr} \quad (S3)$$

where  $r$  is the distance from the bead axis to the DNA attachment point and can be determined by rotating the bead and fitting a circle to the  $xy$  positions,  $R$  is the bead radius, and  $\beta$  the angle formed by the DNA attachment point and the horizontal plane (Fig. S6A).

#### Lateral Magnetic Tweezers configuration (Fig. S6B)

$$x^{**} = x - (R - z_{corr})\cos \alpha \quad (S4)$$

$$z^{**} = z + R(1 - \sin \alpha) + z_{corr}\sin \alpha \quad (S5)$$

$$l = \sqrt{x^{**2} + z^{**2}} \quad (S6)$$

In the capillary case  $\alpha=0$ , and assuming the perfect horizontal geometry of the DNA (Fig. 3),  $z^{**} = 0$  and Eq. S4 becomes

$$l = x^{**} = x - R + z_{corr} \quad (S7)$$

Note that  $z_{corr}=0$  for all the different configurations recovers the simplified scenario with the DNA molecule attached at the central axis of the bead at its lowest point.

### **Additional calculations for bead-based laminar flow experiments**

#### **Maximum Reynolds number in flow-stretch experiments:**

The Reynolds number of the system is calculated as:

$$Re = \frac{2r\rho v_{mean}}{\eta} \quad (S8)$$

where  $v_{mean}$  is the linear velocity corresponding to the applied flow ( $v_{mean} \approx 3 \cdot 10^{-3} \text{ m s}^{-1}$  for the maximum flow rate),  $\eta$  the dynamic viscosity of the fluid ( $10^{-3} \text{ Pa s}$ ) and  $\rho$  the density of the fluid ( $1 \text{ g cm}^{-3}$ ). As the theoretical calculation is done in a circular tube,  $r$  is the equivalent radius for circular geometry,  $r = (d \cdot w)/(d + w)$ . In this case,  $d \approx 200 \text{ }\mu\text{m}$  and  $w \approx 7 \text{ mm}$  and we obtain a radius  $r \approx 190 \text{ }\mu\text{m}$ . This gives a Reynolds number of  $Re \approx 0.001 \ll 2000$ . Thus our system is always under laminar flow conditions.

#### **Mean theoretical velocity in the center of the bead:**

The average velocity along the diameter of the bead is computed integrating the profile as:

$$v_{flow} = \frac{1}{2R} \int_{z-R}^{z+R} v_{max} \left( 1 - \frac{(r-z)^2}{r^2} \right) dz = - \frac{v_{max}(3z(z-2r) + R^2)}{3r^2}$$

In our case,  $r \approx 190 \text{ }\mu\text{m}$  (the previously obtained value for the equivalent radius),  $R = 0.5 \text{ }\mu\text{m}$  and we have considered  $z = 1 \text{ }\mu\text{m}$  (based on the average value of our experiments).

This gives  $v_{flow} = 0.0105 v_{max}$ , so 1% of  $v_{max}$ .

**Table S1.** References to the components of the *Lateral Magnetic Tweezers Module*.

| Description                     | Manufacturer | Reference | Comments                          |
|---------------------------------|--------------|-----------|-----------------------------------|
| Piezoelectric translation motor | PiezoMotor   | LL1011A   |                                   |
| Piezoelectric motor controller  | PiezoMotor   | PMD101    |                                   |
| Encoder                         | PiezoMotor   | 102822    |                                   |
| Translation stage               | Newport      | M-MR1.4   | Need two units                    |
| Bracket to breadboard           | Home made    |           | See Fig. S1 for technical drawing |
| Coupling between stages         | Home made    |           | See Fig. S2 for technical drawing |
| Coupling to motor               | Home made    |           | See Fig. S3 for technical drawing |

**Table S2.** References to the components of the *Capillary Holder and Rotation Module*.

| Description                    | Manufacturer          | Reference | Comments                          |
|--------------------------------|-----------------------|-----------|-----------------------------------|
| Piezoelectric rotary motor     | PiezoMotor            | LR17      |                                   |
| Piezoelectric motor controller | PiezoMotor            | PMD101    |                                   |
| Timing belt                    | RS                    | 778-5039  | One unit                          |
| Timing belt pulley             | RS                    | 778-4752  | Two units                         |
| Ball bearing                   | RS                    | 612-5745  | Four units                        |
| Brass tube                     |                       |           | 1 mm diameter                     |
| Glass capillary                | Vitrotubes (Vitrocom) | 8320      | 0.2 mm x 0.2 mm cross section     |
| Capillary holder               | Home made             |           | See Fig. S4 for technical drawing |
| Motor holder                   | Home made             |           | See Fig. S5 for technical drawing |

**Table S3.** Oligonucleotide sequences.

| Name      | Sequence                       | Comments                       |
|-----------|--------------------------------|--------------------------------|
| CosL-tail | [Phos]AGGTCGCCGCCCAAAAAAAAAA   | To be labeled with Biotin      |
| CosR-tail | [Phos]GGGCGGCGACCTAAAAAAAAA    | To be labeled with Biotin      |
| XbaI-A    | [Phos]CTAGACCCGGGCTCGAGGATCCCC | To be labeled with Digoxigenin |
| XbaI-B    | GGGGATCCTCGAGCCCGGGT           | Unlabeled                      |

**TableS4.** Parameters used in flow-stretch experiments

| Parameter | Value     | Units              | Description                        |
|-----------|-----------|--------------------|------------------------------------|
| $\eta$    | $10^{-3}$ | Pa s               | Dynamic viscosity of the fluid     |
| $\rho$    | 1         | $\text{g cm}^{-3}$ | Density of the fluid               |
| $d$       | 200       | $\mu\text{m}$      | Height of the flow cell            |
| $w$       | 7         | mm                 | Width of flow cell                 |
| $r$       | 190       | $\mu\text{m}$      | Equivalent radius on circular pipe |
| $R$       | 0.5       | $\mu\text{m}$      | Radius of the bead                 |

Bracket to breadboard

Material: aluminium

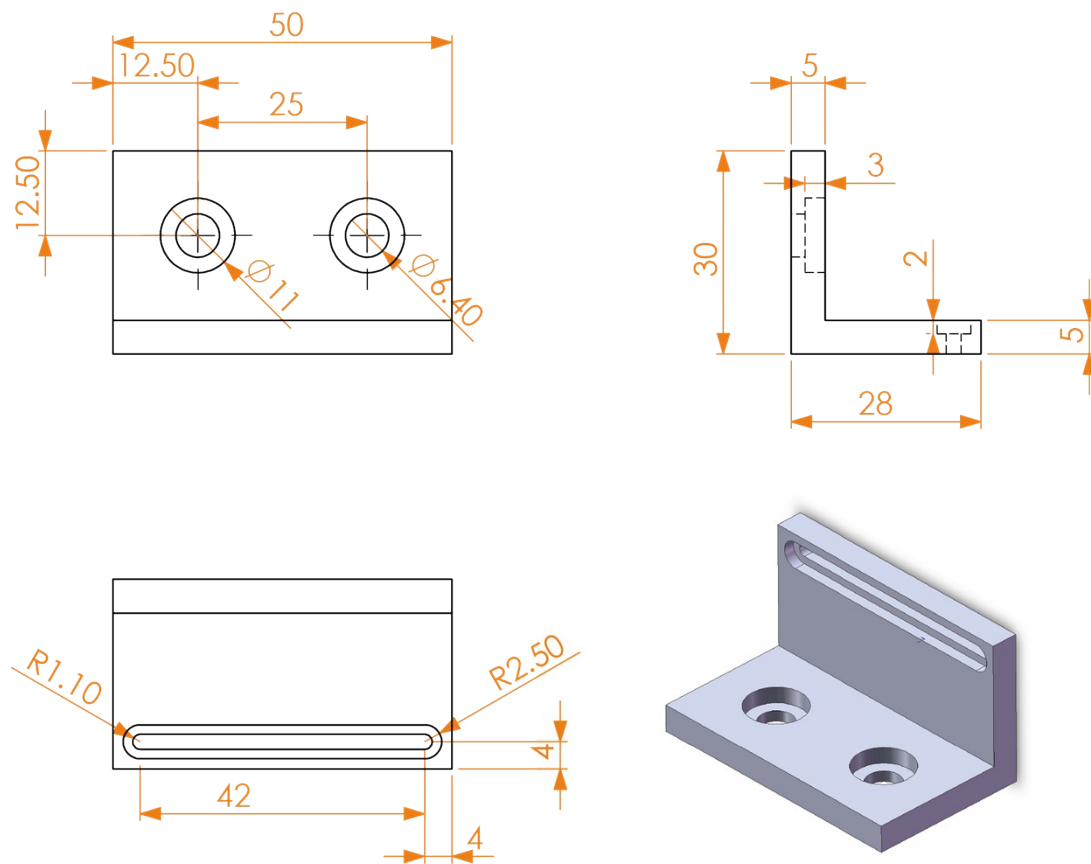

**Fig. S1.** Technical drawing of the "bracket to breadboard" component of the Lateral Pulling Module. All dimensions are in millimeters.

Coupling between stages    Material: aluminium

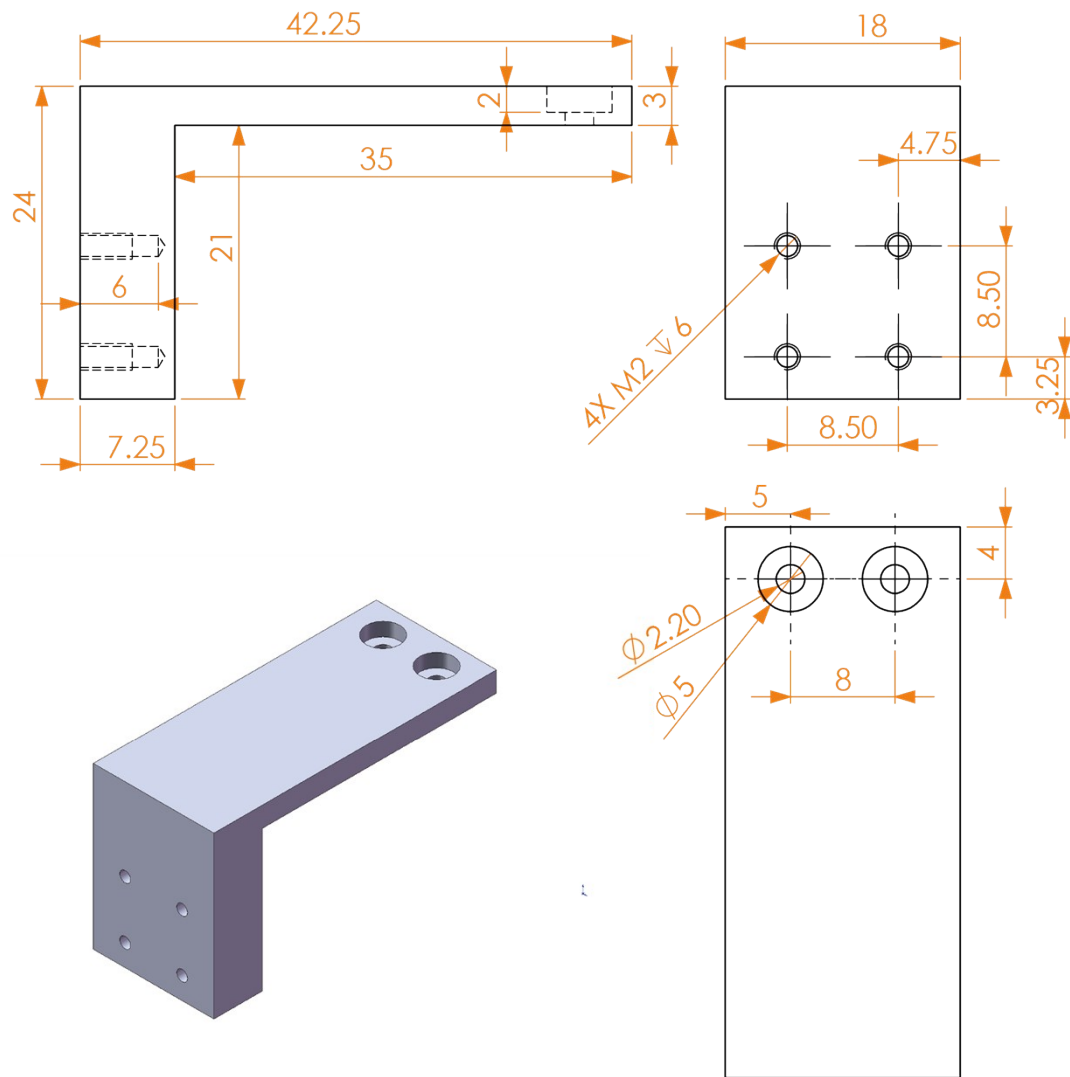

**Fig. S2.** Technical drawing of the "coupling between stages" component of the Lateral Pulling Module. All dimensions are in millimeters.

Coupling to motor    Material: aluminium

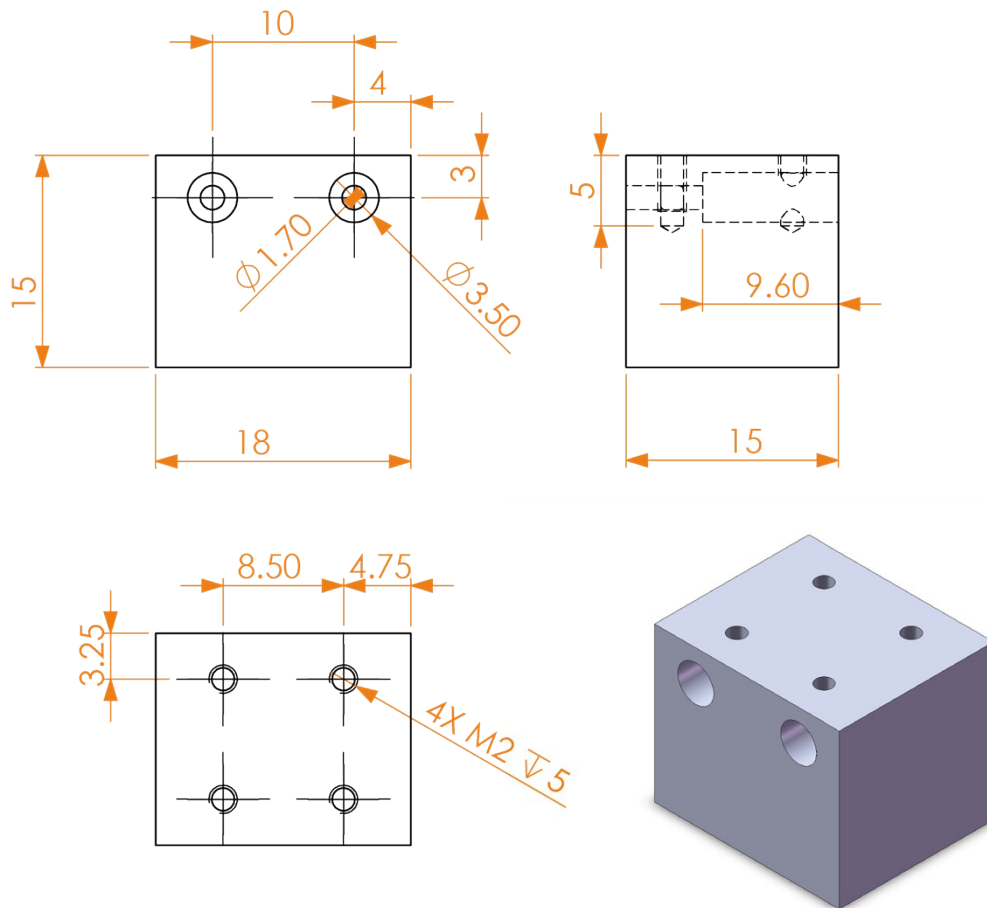

**Fig. S3.** Technical drawing of the "coupling to motor" component of the Lateral Pulling Module. All dimensions are in millimeters.



Capillary holder part A Material: aluminium

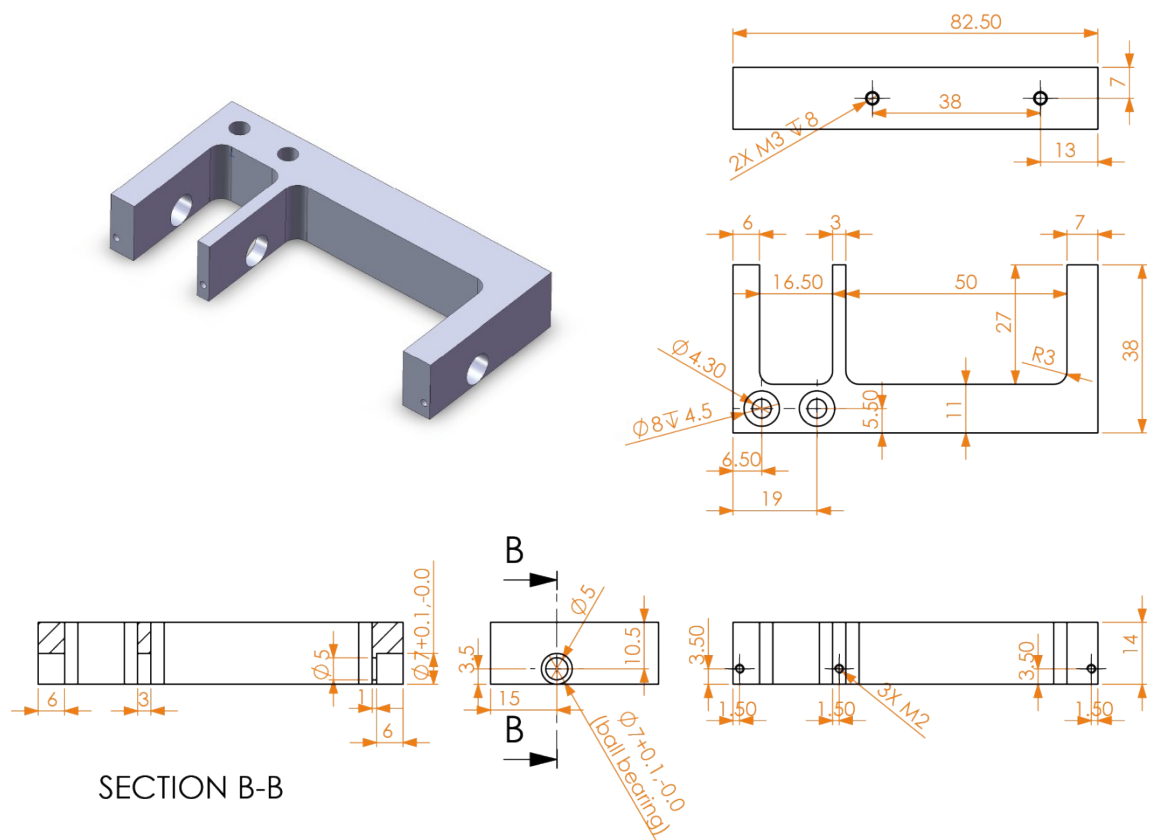

**Fig. S4.** Technical drawing of the "capillary holder" component of the Capillary holder and Rotation Module. All dimensions are in millimeters.

Capillary holder part B Material: aluminium

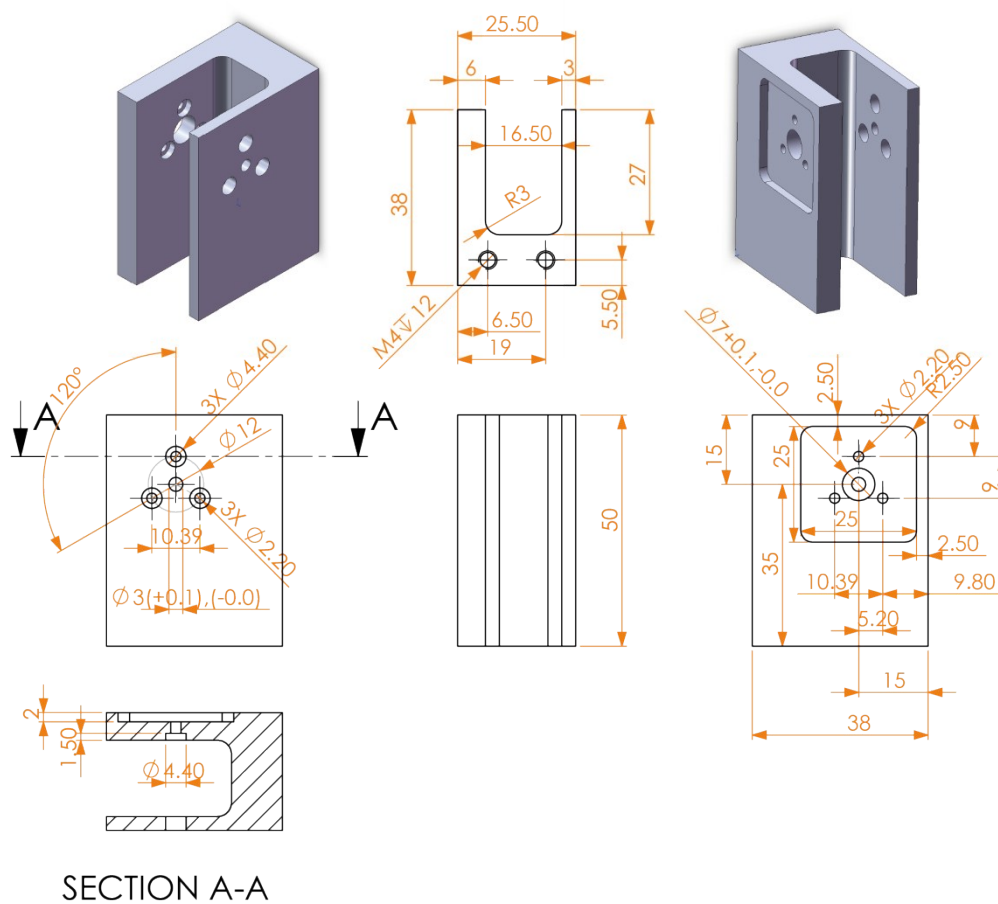

**Fig. S5.** Technical drawing of the "motor holder" component of the Capillary holder and Rotation Module. All dimensions are in millimeters.

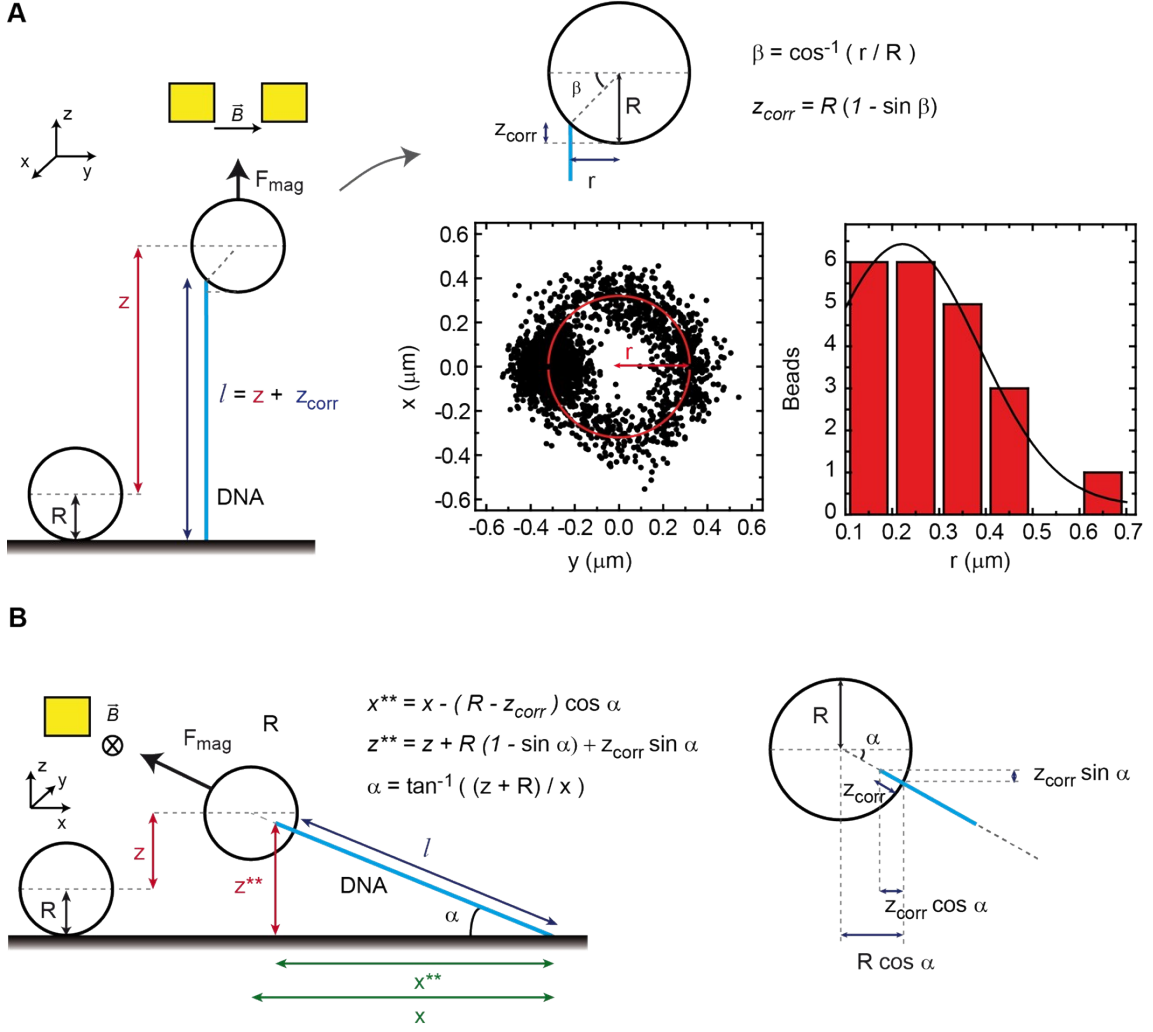

**Fig. S6.** Realistic measurement of the force in vertical and lateral magnetic tweezers in cover glass cells. (A) Cartoon of the geometric representation of extension measurements in vertical pulling, where the DNA molecule is anchored off-center of the bead (left side). The extension needs to be corrected by a factor  $z_{corr}$  (right side, top), which can be obtained from the rotation radius ( $r$ ) of the bead (right side, bottom). Histogram of rotation radius exhibits peak at  $0.2 \mu\text{m}$ . (B) Cartoon of the geometric representation of extension measurements in lateral pulling, where the DNA molecule is anchored off-center of the bead. Extension is computed as  $l = \sqrt{x^{**2} + z^{**2}}$ , and includes a correction factor  $z_{corr}$  analogous to the vertical pulling case (detail in right side).

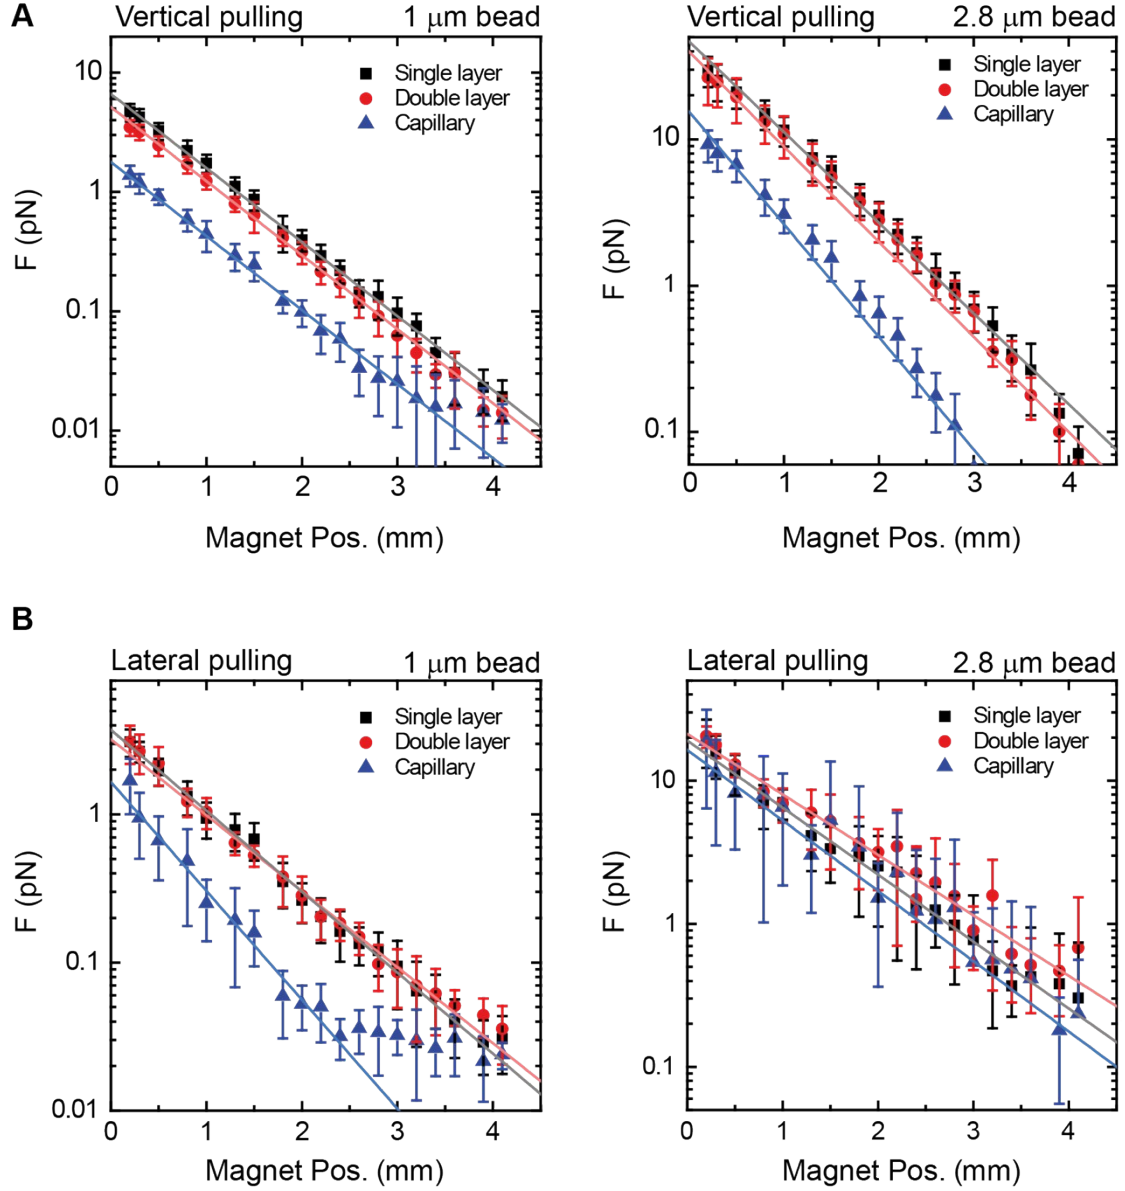

**Fig. S7.** Force as a function of magnet position for each magnet configuration and bead size. (A) Vertical magnets configuration and 1  $\mu\text{m}$  beads (left). Lateral magnets configuration and 1  $\mu\text{m}$  beads (right). (B) Vertical magnets configuration and 2.8  $\mu\text{m}$  beads (left). Lateral magnets configuration and 2.8  $\mu\text{m}$  beads (right). Data was obtained for  $\lambda/2$  long DNA molecules and in flow cells of one or two layers of parafilm and in glass capillaries and then fit to an exponential function  $f(x) = 10^{(-A \cdot x + B)}$  (solid line). Maximum forces are shown in Table 2. Error bars are the SD.

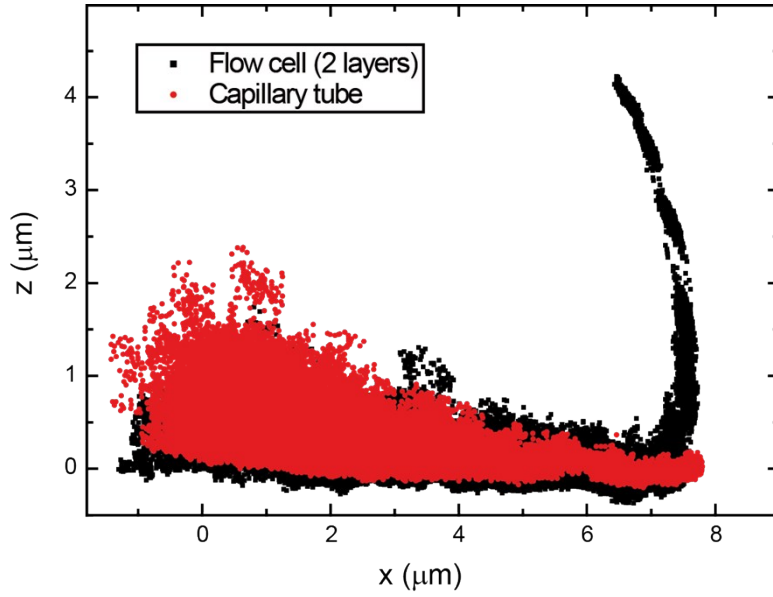

**Fig. S8.** Beads in regular two-parafilm layer flow cells show a lift-off upon the application of high forces. The same occurs in the case of single-layer cells (data not shown) but not in the capillary tubes, where the bead rests on the surface throughout the whole tracking.

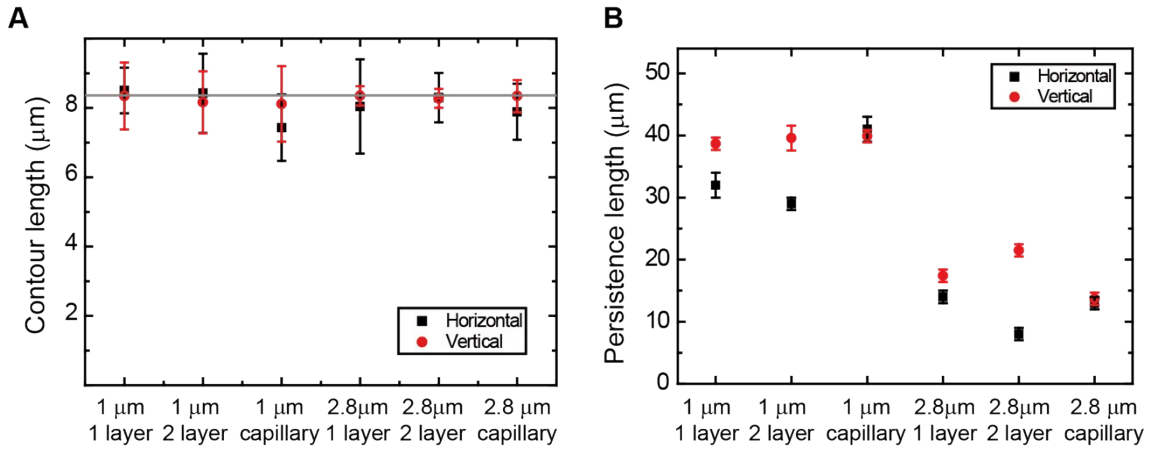

**Fig. S9.** Contour and persistence length for each magnet configuration and bead size. (A) Contour length values were obtained by fitting individual DNA molecules to the WLC model and then averaging them, errors are SD. The values agree with the theoretical length expected for a 24.5 kbp long DNA molecule. (B) Persistence length values were obtained by fitting an averaged force-extension curve to the WLC model in each of the conditions (errors are errors from the fit).

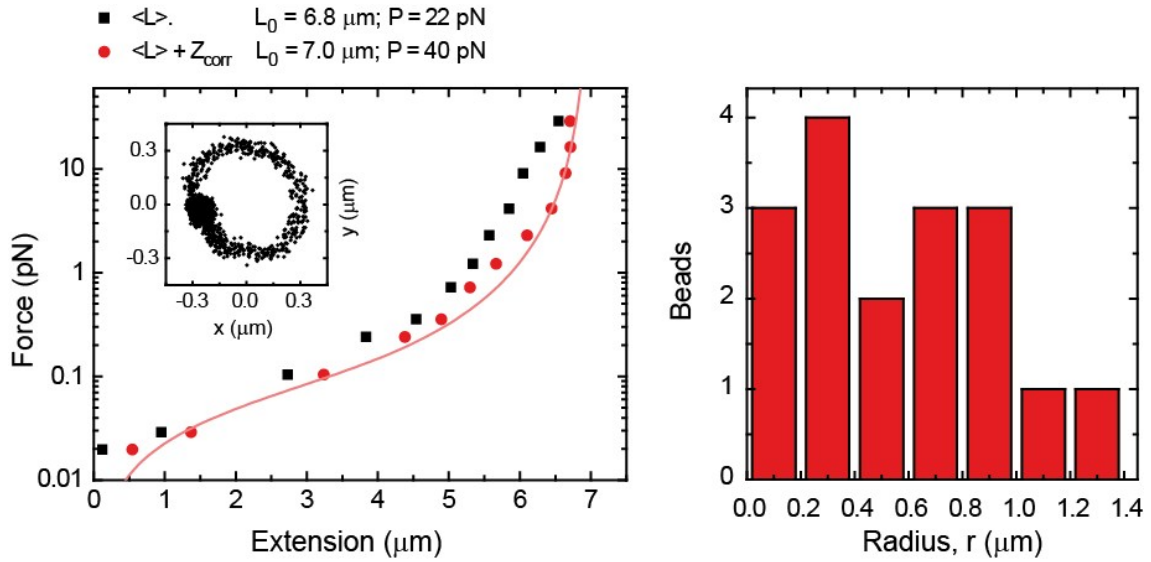

**Fig. S10.** The use of the correction factor  $Z_{\text{corr}}$  considerably improved the fit to WLC model in off-center attached  $2.8 \mu\text{m}$  beads in vertical pulling.<sup>37</sup> The rotation radius histogram in the case of  $2.8 \mu\text{m}$  beads shows more dispersedly anchored beads than the one for  $1 \mu\text{m}$  beads.

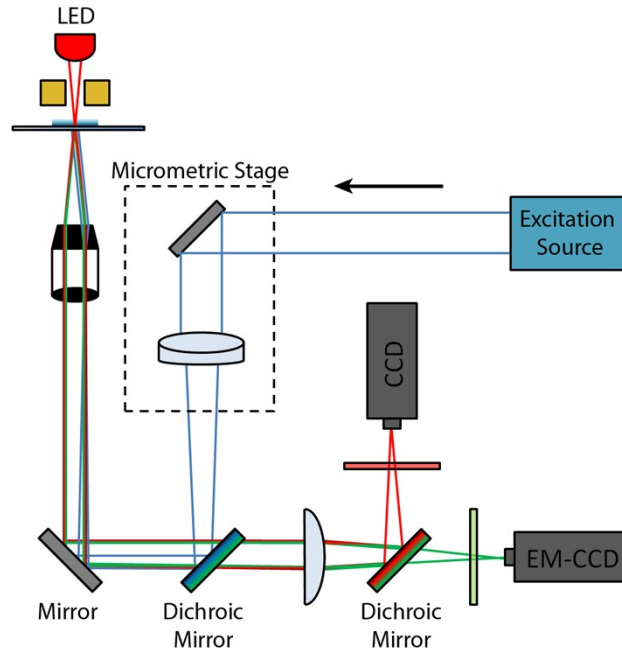

**Fig. S11.** Schematic home-built TIRF microscope setup. 488 nm laser light (Vortran Stradus) is reflected in a mirror placed in a micrometric stage which can be translated along the axis of incoming light, allowing to switch between TIRF and epi-illumination. A lens (Newport) focuses the beam onto the back focal plane of the objective (Olympus UAPON TIRF 100x). Light from the tweezers LED (Thorlabs) and emitted fluorescence is directed back to the objective, passed through a dichroic mirror and focused on an Andor Ixon Ultra 897 EM-CCD camera (for fluorescence) and Pulnix 6710CL CCD camera (for bright-field microscopy) by a tube lens (Newport). Another dichroic mirror allows the separation of both beams and the signals are subsequently filtered. All filters and dichroic mirrors on the fluorescence path are purchased from Chroma.
